# Supplementary material for: A vanadium atom sandwiched by boron nitride and graphene sheets for electrochemical reduction of nitric oxide: insights from first-principles calculations
Source: Royal Society of Chemistry journal article supplement (doi:10.1039/d5nj03499j), 2025-01-01

# “Supporting Information”

## **A Vanadium Atom Sandwiched by Boron Nitride and Graphene Sheets for Electrochemical Reduction of Nitric Oxide: Insights from First-Principles Calculations**

Osamah Abdulbari Khadhair <sup>1</sup>, Roopashree R <sup>2</sup>, Helen Merina Albert <sup>3</sup>, Subhashree Ray <sup>4</sup>, Renu Sharma <sup>5</sup>, Saodatkhon Ibragimova <sup>6,7</sup>, Akmal Abilkasimov <sup>8</sup>, Abdusalom Umarov <sup>9</sup>, Pradeep Jangir <sup>10-12</sup>, M.A. Diab <sup>\*,13,14</sup>, Mumtaj Shah <sup>15</sup>

**Figure S1.** (a) Final structure of BN/V/Gr after the AIMD simulations, and (b) potential energy diagram versus time during the AIMD simulations

(a)

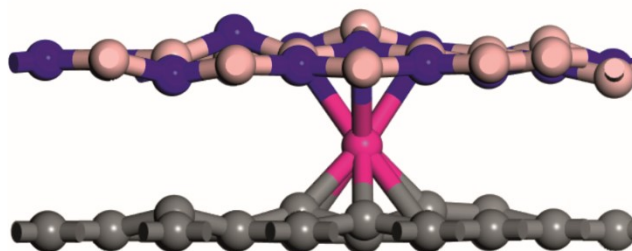

(b)

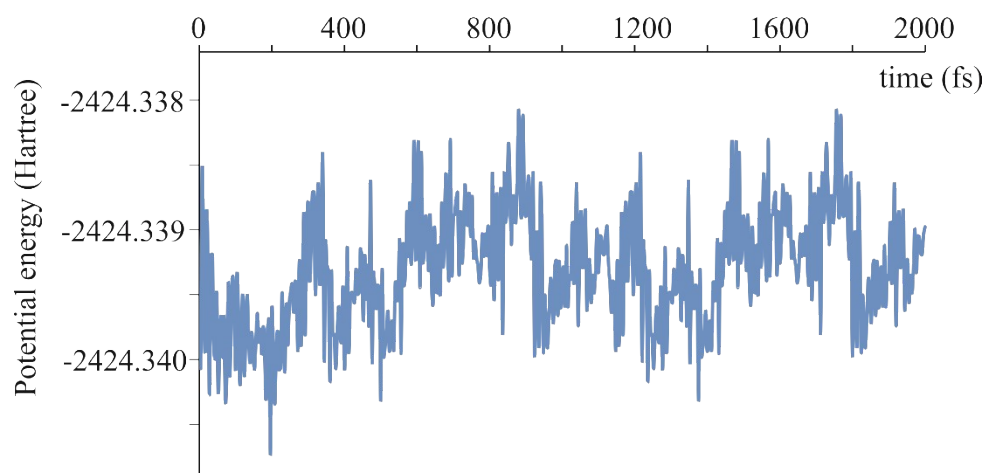

**Figure S2.** Interaction of NO molecule with the V atom of BN/V/Gr

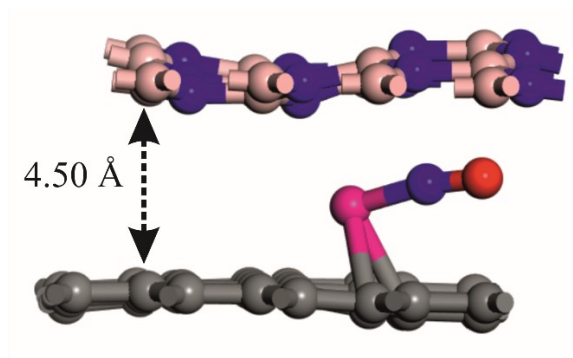

Supplement: d5nj03499j1.pdf [file d5nj03499j1.pdf]
